# Supplementary material for: Spinal miRNA-124 regulates synaptopodin and nociception in an animal model of bone cancer pain
Source: PubMed Central journal article supplement (PMC5591226; doi:10.1038/s41598-017-10224-1), 2017-09-08
Supplement: 41598_2017_10224_MOESM1_ESM.pdf [file 41598_2017_10224_MOESM1_ESM.pdf]

# Spinal miRNA-124 regulates synaptopodin and nociception in an animal model of bone cancer pain

Sara Elramah<sup>1,2</sup>, María José López-González<sup>1,2</sup>, Matthieu Bastide<sup>1,2</sup>, Florence Dixmérias<sup>3</sup>, Olivier Roca-Lapirot<sup>1,2</sup>, Anne-Cécile Wielanek-Bachelet<sup>4</sup>, Anne Vital<sup>5</sup>, Thierry Leste-Lasserre<sup>6</sup>, Alexandre Brochard<sup>6</sup>, Marc Landry<sup>1,2</sup>, Alexandre Favereaux<sup>\*1,2</sup>.

## Supplementary Figures

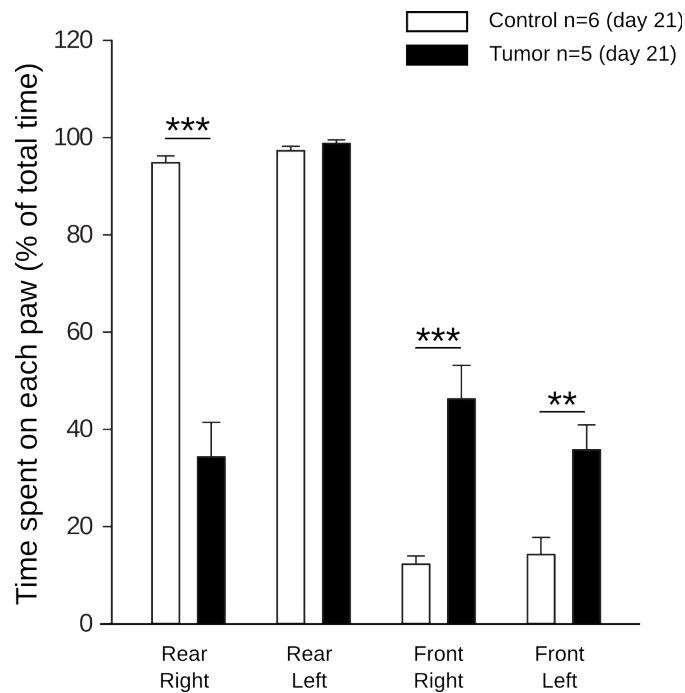

### Supplementary Figure 1. Compensatory pain behavior in cancer mice.

Measurement with DWB showed a compensatory behavior in cancer mice which consists in an increase in the time spent leaning on the intact paws (\*\*  $P < 0.01$ , \*\*\*  $P < 0.001$ , two-way ANOVA followed by a Bonferroni post-test).

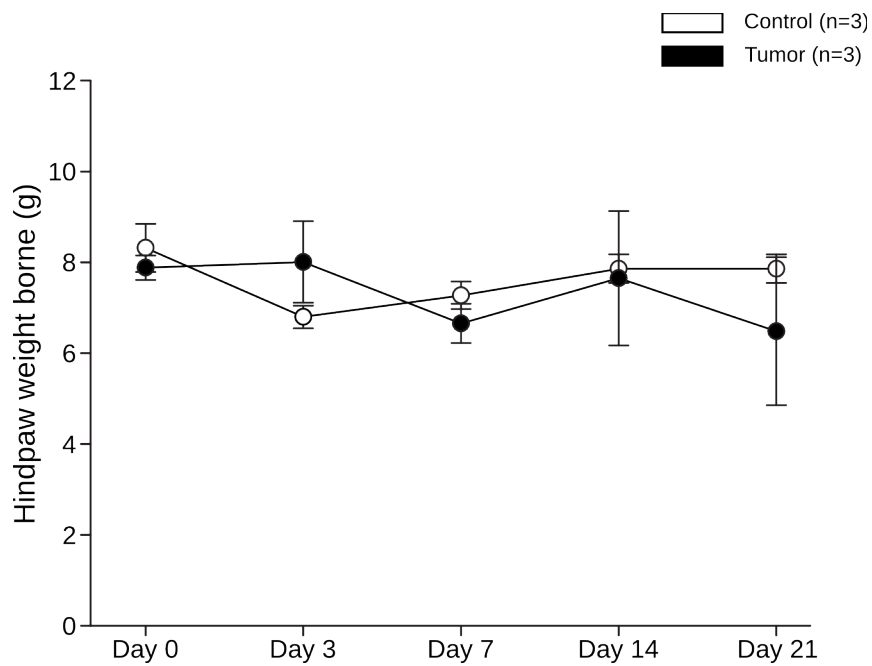

**Supplementary Figure 2. Quadriceps Injection of sarcoma cells in quadriceps muscle is non-noxious and validate relevance of the cancer pain model.**

Mice injected with cancer cells in the quadriceps showed no nociceptive state when compared with control group injected with saline (one-way ANOVA with repeated measures).

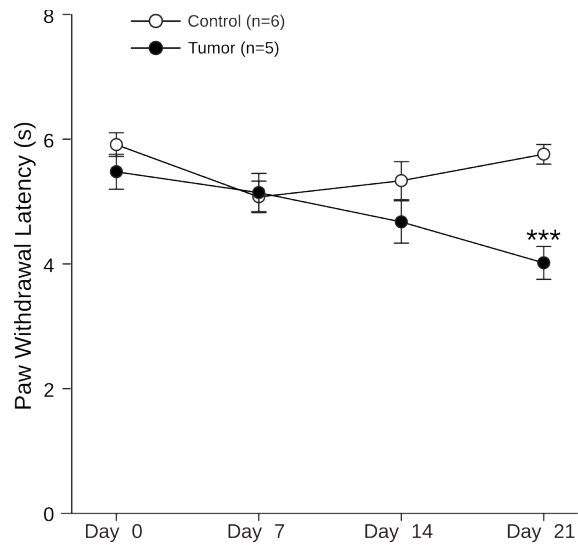

**Supplementary Figure 3. Hyperalgesia behavior in cancer mice.**

Testing thermal hyperalgesia using Hargreaves test revealed a significant decrease in the paw withdrawal latency of ipsilateral paws in tumor-injected group compared to controls (\*\*\* P < 0.001, one-way ANOVA with repeated measures followed by Bonferroni post-test).

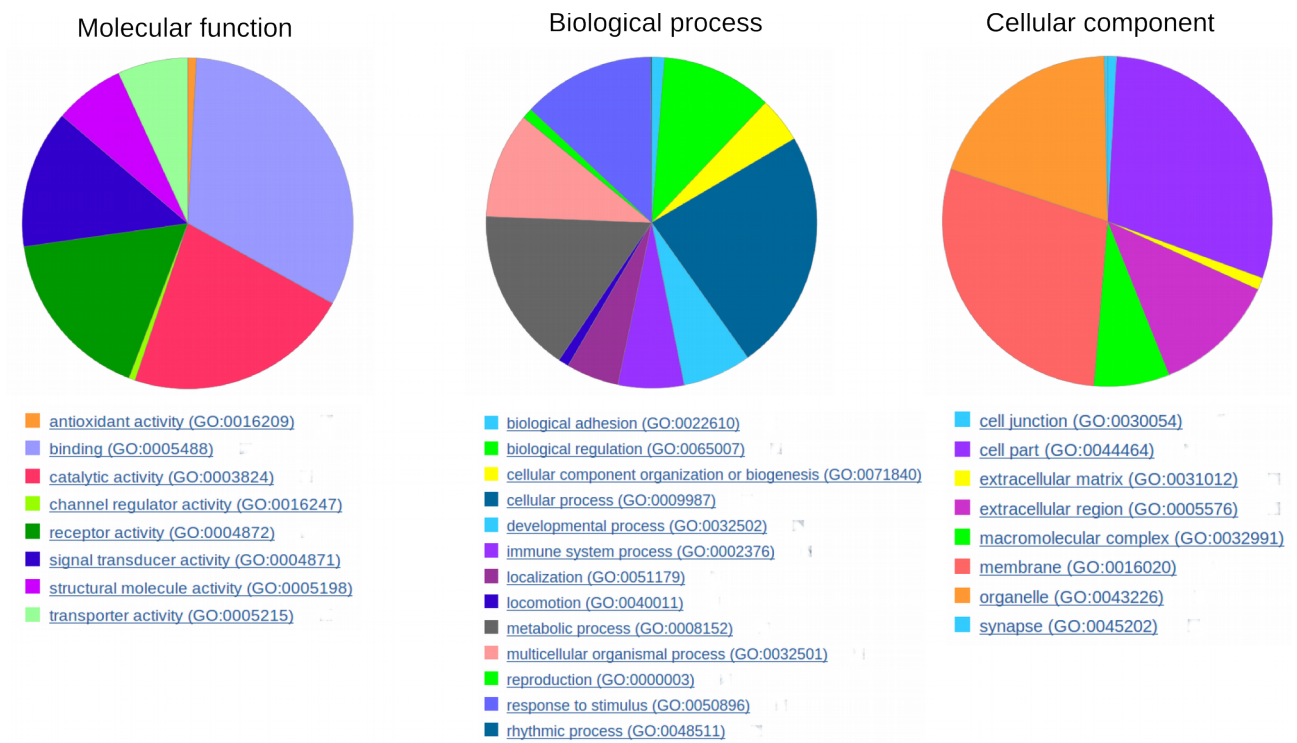

**Supplementary Figure 4. Gene ontology analysis of differentially expressed mRNAs in bone cancer pain condition.**

Gene expression in the dorsal horn of the spinal cord is strongly affected in bone cancer mice. GO term analysis of the differentially expressed genes shows that a wide range of molecular functions, biological processes and cellular components are affected.

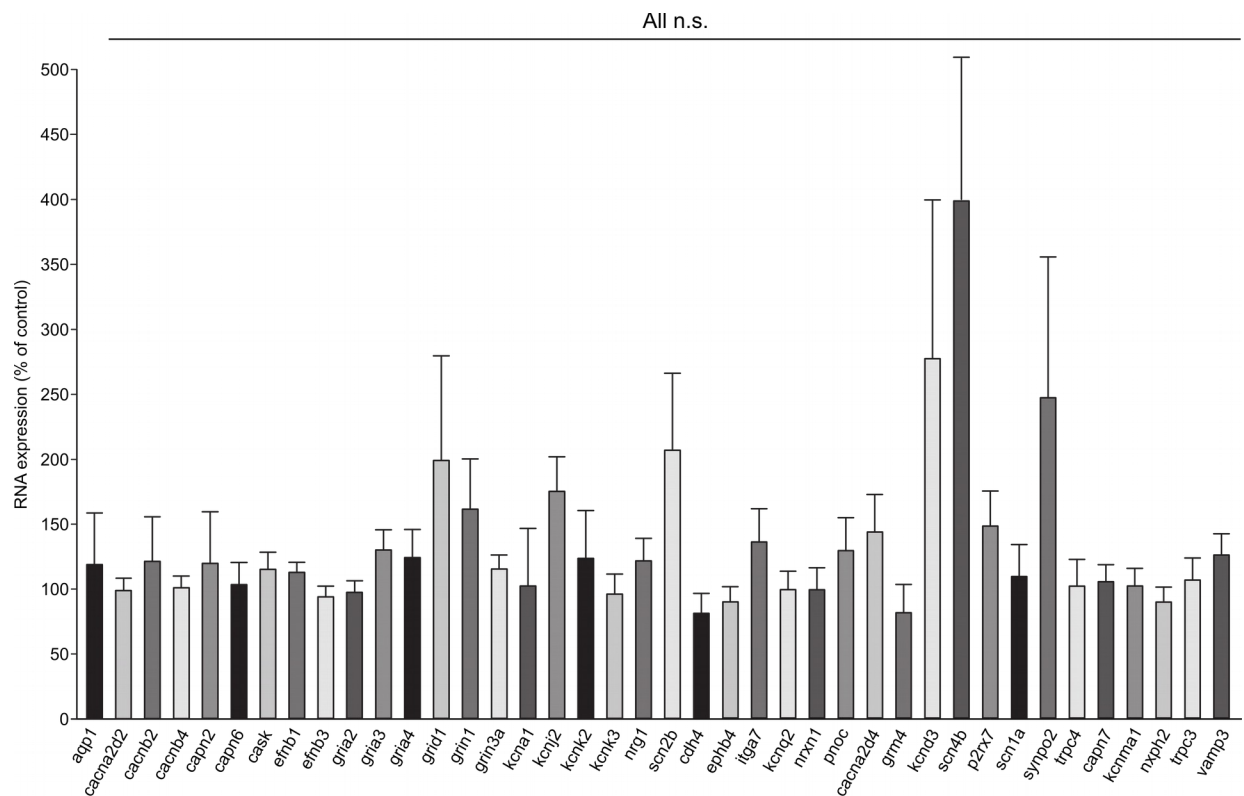

**Supplementary Figure 5. RT-qPCR analysis of miR-124 target genes.**

Expression analysis of a subset of predicted target genes for miR-124 known to be involved in nociception. Expression of these 40 genes was not significantly affected in the spinal cord of tumor-bearing mice (n=5) compared to control mice (n=6).

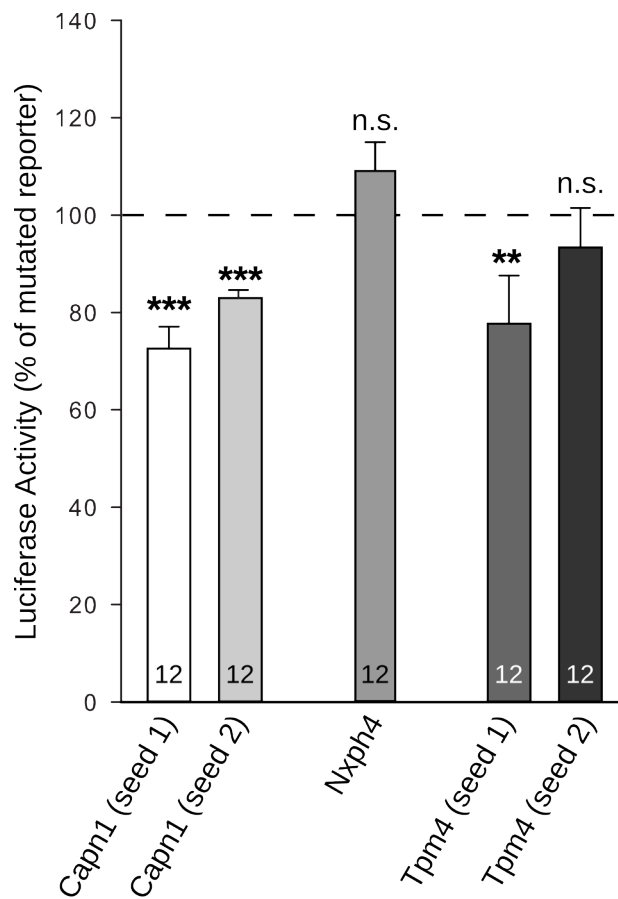

**Supplementary Figure 6. Luciferase assay for Capn1, Nxph4 and Tpm4.**

The 3'UTR of Nxph4 was unable to induce a specific down-regulation of the luciferase reporter, a moderate but significant reduction in the luciferase signal was mediated by one of the two miR-124 seed regions in Tpm4 3'UTR and by both miR-124 binding sites in Capn1 3'UTR (\*\* P < 0.01 and \*\*\* P < 0.001, one-way ANOVA followed by Bonferroni post-test)

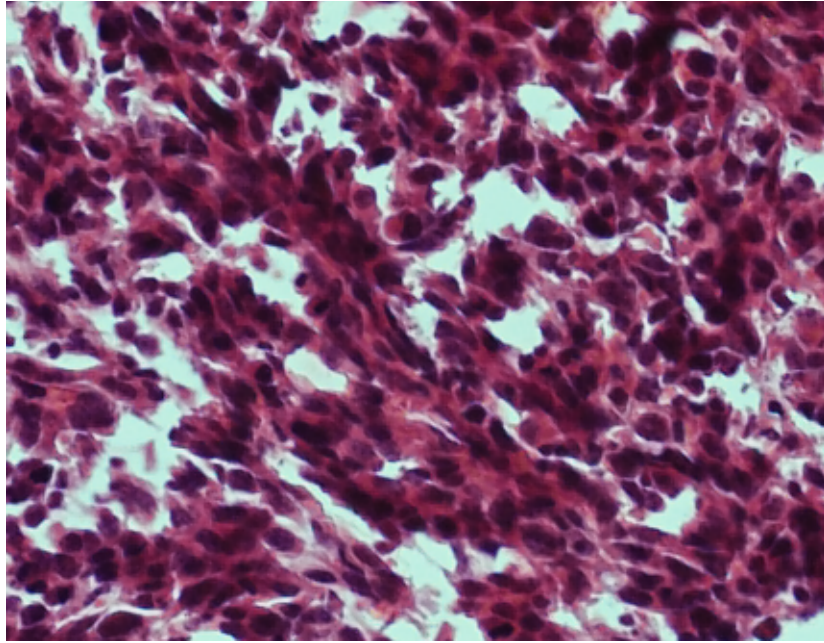

**Supplementary Figure 7. Histological analysis of the tumor of miR-124 treated mice.**

Cancerous mice subjected to intrathecal injections of miR-124 mimics exhibit the same tumor histology and growth as non-treated mice (Figure 1C&D).

## Supplementary Materials and Methods

### *Osteolytic Cell Culture*

NCTC 2472 tumor line (ATCC, Manassas, VA), was cultured in NCTC 135 medium (Sigma-Aldrich, St. Louis, MO) containing 10% horse serum (GIBCO).

### *HEK-293T Cell Culture*

HEK-293T cell line was cultured in Dulbecco's Modified Eagle's Medium (DMEM) containing 10% goat serum.

### *Polymerase Chain Reaction and Quantitative Real-time PCR*

Quantification of mRNAs and miRNAs by qRT-PCR was performed in triplicate on a Roche LightCycler 480-II using TaKaRa SYBER® Premix Ex Taq™ (Tli RNaseH Plus).

Primer sequences are the following:

succinate dehydrogenase complex, subunit A:

SDHA Forward 5' TGC-GGA-AGC-ACG-GAA-GGA-GT

SDHA Reverse 5' CTT-CTG-CTG-GCC-CTC-GAT-GG

calpain 1, ( $\mu$ /I) large subunit:

Capn1 Forward 5' AGA-CCT-GGA-TGG-TGT-TGT-G

Capn1 Reverse 5' AAG-AAC-AAA-GGC-AAC-TGG-AG

neurexophilin 4:

Nxph4 Forward 5' GCC-AAG-CCC-TTC-AAA-GTC

Nxph4 Reverse 5' TGC-TCA-CTC-TGG-AAG-TTA-TAG-TC

synaptopodin:

Synpo Forward 5' GTG-AGT-CCC-ACT-TAC-AGC-AG

Synpo Reverse 5' AGA-AGG-AGG-GCT-TCC-ACA-C

tropomyosin 4:



Tpm4 Forward 5' GTA-AGT-TGG-TCA-TCC-TGG-AG

Tpm4 Reverse 5' ACC-ACA-CTT-TAG-TTC-AGA-TAC-C

To clone miR-124 in expression vector (pcDNA3.1), we amplified a 426bp genomic region containing miR-124.
